# Supplementary material for: Surface-enhanced Raman scattering (SERS) spectroscopy on localized silver nanoparticle-decorated porous silicon substrate
Source: Royal Society of Chemistry journal article supplement (doi:10.1039/d1an01708j), 2021-01-01
Supplement: d1an01708j1.pdf [file d1an01708j1.pdf]

# **Surface-enhanced Raman scattering (SERS) spectroscopy on localized silver nanoparticles decorated porous silicon substrate**

Chia-Wen Tsao<sup>1,\*</sup>, You-Shan Zheng<sup>1</sup>, Ya-Sen Sun<sup>2</sup>, and Yu-Che Cheng<sup>3,4,5</sup>

<sup>1</sup>*Department of Mechanical Engineering, National Central University, Taoyuan 32001, Taiwan*

<sup>2</sup>*Department of Chemical and Materials Engineering, National Central University, Taoyuan 32001, Taiwan*

<sup>3</sup>*Proteomics Laboratory, Department of Medical Research, Cathay General Hospital, Taipei 10630, Taiwan*

<sup>4</sup>*School of Medicine, Fu-Jen Catholic University, New Taipei City 242062, Taiwan*

<sup>5</sup>*Department of Biomedical Sciences and Engineering, National Central University, Taoyuan 32001, Taiwan*

\*Corresponding author.

E-mail: [cwtsao@ncu.edu.tw](mailto:cwtsao@ncu.edu.tw)

Tel: +886-3-4267343

Fax: +886-3-4254501

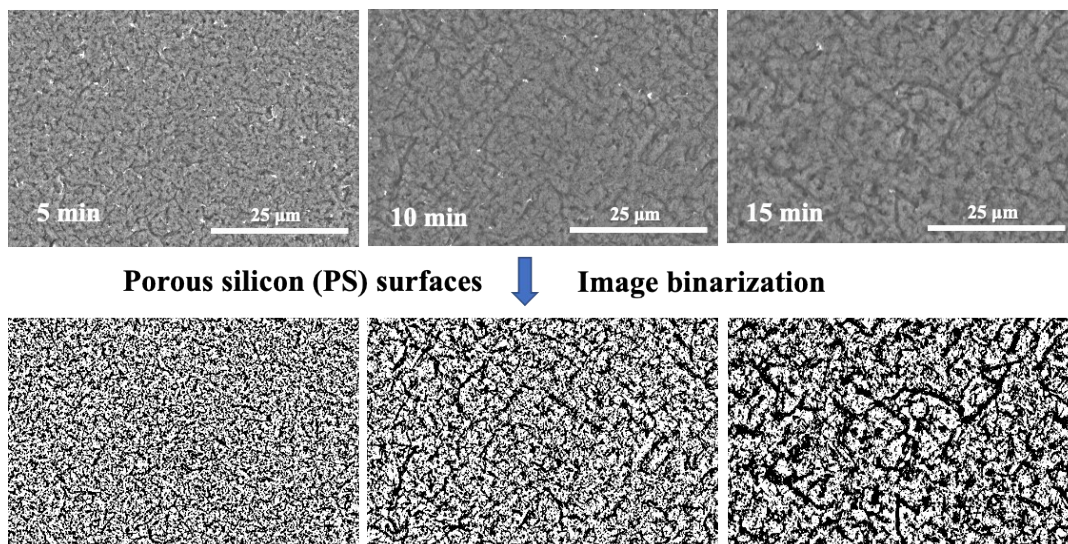

Figure S1. Image binarization of porous silicon (PS) FE-SEM images

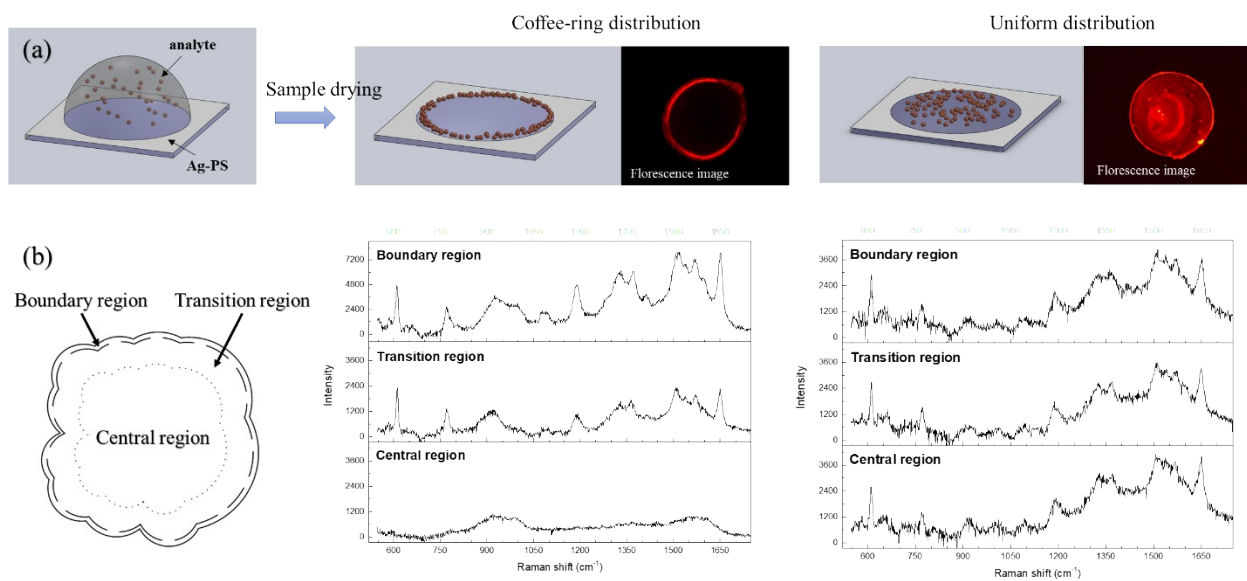

Figure S2. (a) Schematic illustration and fluorescent image of the coffee-ring shape and uniform analyte distribution after sample (R6G) drying. (b) three (boundary, transition, and central) distribution regions and their corresponding SERS spectrum of 10  $\mu\text{L}$ ,  $10^{-5}\text{M}$  R6G sample. The  $2 \times 2 \text{ cm}^2$  Ag-PS surface is generated by 5 mins MACE.

(a) Hydrophobic coating (Ultra-Ever Dry)

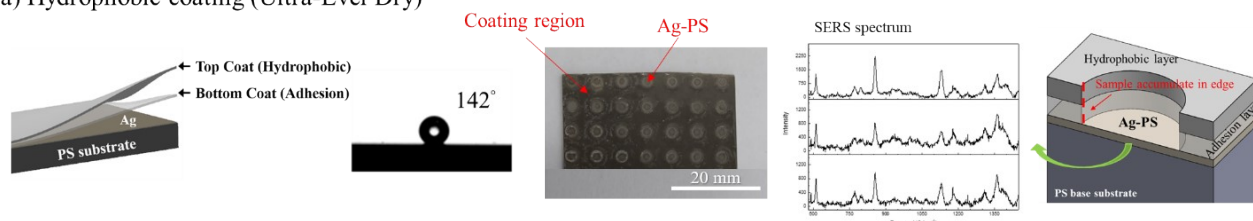

(b) Teflon hydrophobic film

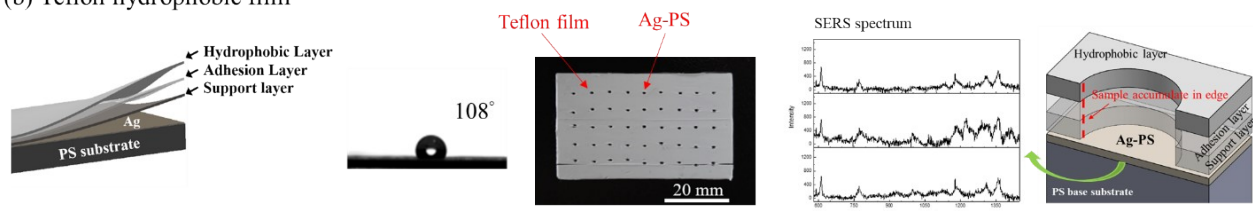

Figure S3. Schematic illustration of using (a) hydrophobic coating and (b) Teflon film to constatin the droplet from spreading on a hydrophilic Ag-PS surface and SER spectrum. The hydrophobic coating process starts with first attach an 800  $\mu\text{m}$  radius shadow mask on the PS surface. We are then coating with bottom adhesive layer followed by top hydrophobic layer. For Teflon film, we use needle tip punching the Teflon film generating  $\sim 600$   $\mu\text{m}$  radius opening. Then attach to the PS surface.

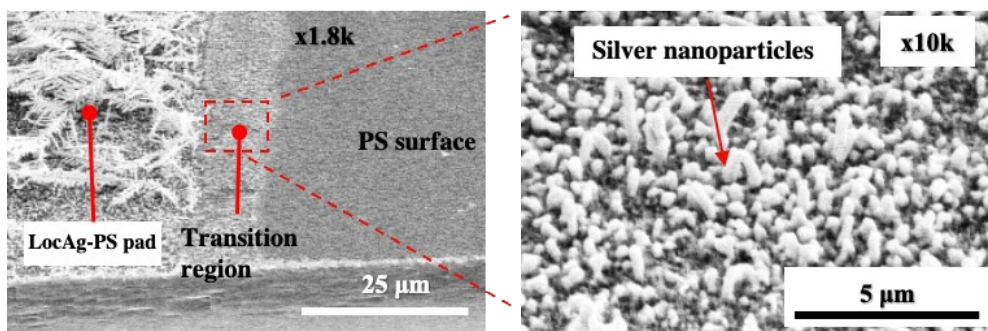

Figure S4. x1.8k (left) and x10k FE-SEM images showing partial deposition of silver nanoparticles in the transition region on porous silicon surface.

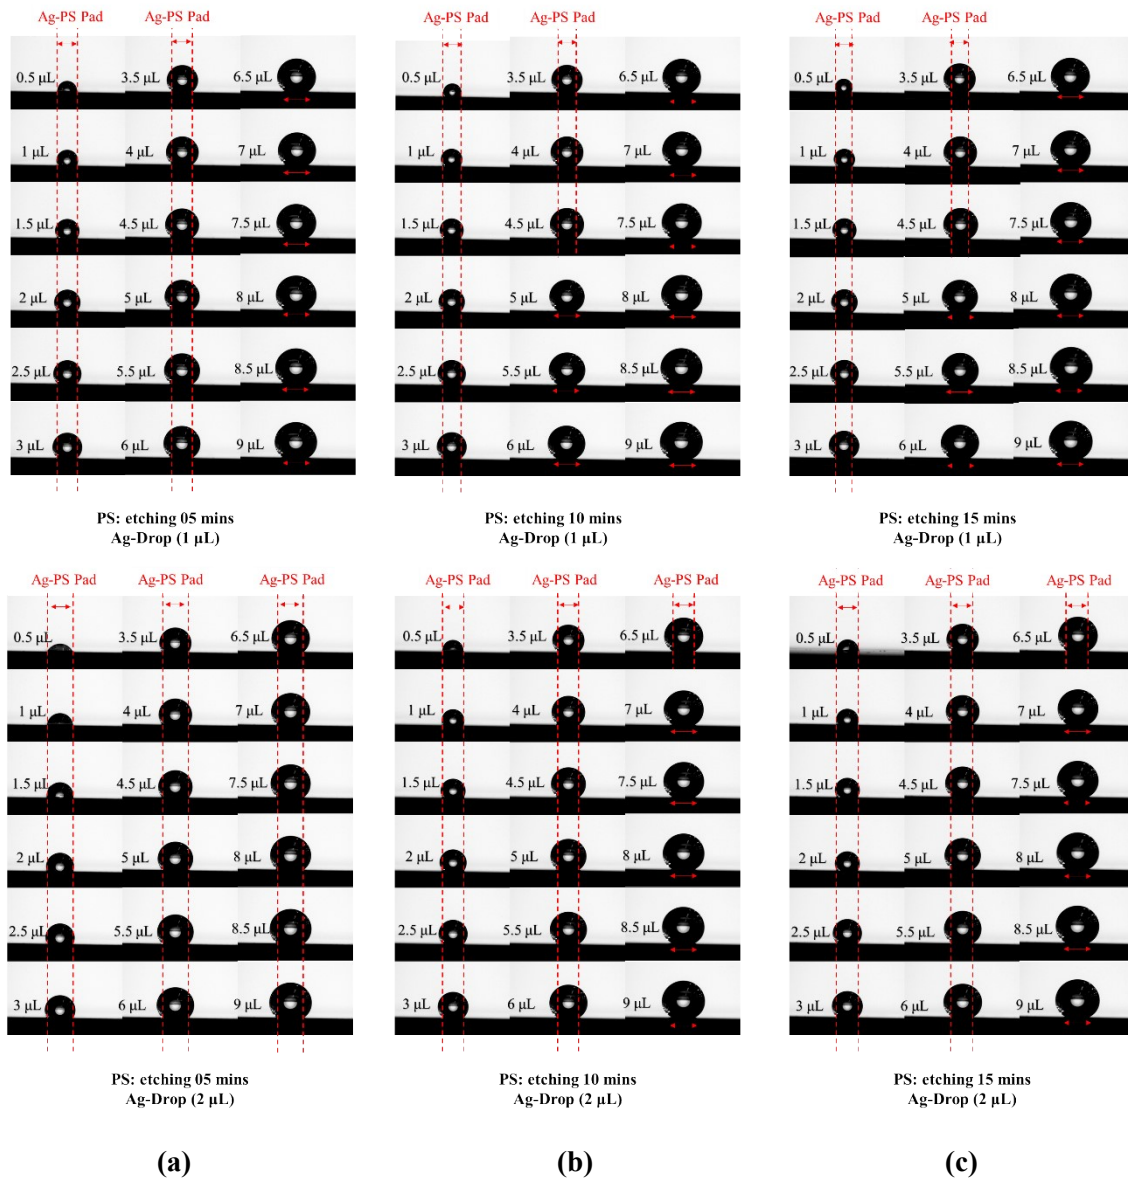

Figure S5. Photograph images of sample (water) droplets deposit on the LocAg-PS pad on (a) 5 mins (b) 10 mins and (c) 15 mins PS base substrates with 1 $\mu$ L and 2 $\mu$ L Ag-Drop deposition condition.
